# Supplementary material for: Clinical features and predictors of masked uncontrolled hypertension from the Korean Ambulatory Blood Pressure Monitoring Registry
Source: PubMed Central journal article supplement — Korean J Intern Med. 2021 Jun 18;36(5):1102–14. doi: 10.3904/kjim.2020.650 (PMC8435491; doi:10.3904/kjim.2020.650), 2021-06-18
Supplement: kjim-2020-650-suppl1.pdf [file kjim-2020-650-suppl1.pdf]

**Supplementary Table 1. Prevalence of MUCH according to types of antihypertensive medications**

| Type of anti-hypertensive drugs | No. | MUCH group | Univariate       |         | Multivariate model 1 <sup>a</sup>   |                      | Multivariate model 2 <sup>b</sup> |                      |         |
|---------------------------------|-----|------------|------------------|---------|-------------------------------------|----------------------|-----------------------------------|----------------------|---------|
|                                 |     |            | OR (95% CI)      | p value | OR (95% CI) vs. the reference group | Adjusted OR (95% CI) | p value                           | Adjusted OR (95% CI) | p value |
| Single agent                    |     |            |                  |         |                                     |                      |                                   |                      |         |
| Total                           | 334 | 172 (51.5) | -                | -       | -                                   | -                    | -                                 | -                    |         |
| ACEI                            | 10  | 7 (70.0)   | 2.25 (0.57-8.85) | 0.246   | Reference                           | 2.40 (0.46-12.5)     | 0.298                             | 0.93 (0.59-1.46)     | 0.762   |
| ARB                             | 127 | 63 (49.6)  | 0.89 (0.57-1.38) | 0.588   | 0.42 (0.10-1.70)                    | 1.04 (0.60-1.81)     | 0.882                             | 2.37 (0.59-9.44)     | 0.222   |
| CCB                             | 97  | 54 (55.7)  | 1.27 (0.79-2.04) | 0.329   | 0.54 (0.13-2.21)                    | 0.92 (0.49-1.70)     | 0.782                             | 1.27 (0.78-2.07)     | 0.330   |
| Diuretics                       | 11  | 4 (36.4)   | 0.53 (0.15-1.84) | 0.315   | 0.24 (0.04-1.52)                    | 0.35 (0.07-1.84)     | 0.216                             | 0.49 (0.14-1.76)     | 0.272   |
| Beta-blocker                    | 67  | 31 (46.3)  | 0.77 (0.45-1.32) | 0.340   | 0.37 (0.09-1.56)                    | 0.93 (0.46-1.86)     | 0.837                             | 0.71 (0.41-1.24)     | 0.226   |

Values are presented as number (%).

MUCH, masked uncontrolled hypertension; OR, odds ratio; CI, confidence interval; ACEI, angiotensin-converting enzyme inhibitor; ARB, angiotensin II receptor blocker; CCB, calcium channel blocker.

<sup>a</sup>Multivariate model 1 includes office systolic blood pressure (3 levels), office diastolic blood pressure (3 levels), stroke, left ventricular hypertrophy (LVH), dyslipidemia, and heart rate  $\geq 75$  bpm as covariates.

<sup>b</sup>Multivariate model 2 includes stroke, LVH, and dyslipidemia, as covariates.
