# Supplementary material for: Clinical features and predictors of masked uncontrolled hypertension from the Korean Ambulatory Blood Pressure Monitoring Registry
Source: PubMed Central journal article supplement — Korean J Intern Med. 2021 Jun 18;36(5):1102–14. doi: 10.3904/kjim.2020.650 (PMC8435491; doi:10.3904/kjim.2020.650), 2021-06-18
Supplement: kjim-2020-650-suppl2.pdf [file kjim-2020-650-suppl2.pdf]

**Supplementary Table 2. The score predicting masked hypertension**

| Office SBP, mmHg |       | Office DBP, mmHg |       | History of stroke |       | LVMI $\geq 116/96$ g/m <sup>2</sup> for male/female |       | No. of anti-hypertensive agents |       | Dyslipidemia |       | Heart rate $\geq 75$ bpm |       |
|------------------|-------|------------------|-------|-------------------|-------|-----------------------------------------------------|-------|---------------------------------|-------|--------------|-------|--------------------------|-------|
| Value            | Scale | Value            | Scale | Value             | Scale | Value                                               | Scale | Value                           | Scale | Value        | Scale | Value                    | Scale |
| < 120            | 0     | < 80             | 0     | No                | 0     | No                                                  | 0     | $\geq 3$                        | 0     | No           | 0     | No                       | 0     |
| 120–129          | 3     | 80–84            | 3.3   | Yes               | 3.6   | Yes                                                 | 2.5   | 2                               | 1.7   | Yes          | 1.9   | Yes                      | 1.4   |
| 130–139          | 10    | 85–89            | 4.2   |                   |       |                                                     |       | 1                               | 3.2   |              |       |                          |       |

SBP, systolic blood pressure; DBP, diastolic blood pressure; LVMI, left ventricular mass index.
