# Supplementary material for: Clinical features and predictors of masked uncontrolled hypertension from the Korean Ambulatory Blood Pressure Monitoring Registry
Source: PubMed Central journal article supplement — Korean J Intern Med. 2021 Jun 18;36(5):1102–14. doi: 10.3904/kjim.2020.650 (PMC8435491; doi:10.3904/kjim.2020.650), 2021-06-18
Supplement: kjim-2020-650-suppl3.pdf [file kjim-2020-650-suppl3.pdf]

**Supplementary Table 3. Goodness of fit between observed probability and predicted probability**

| Score     | No. of patients | Observed frequency | Observed probability | Predicted probability |
|-----------|-----------------|--------------------|----------------------|-----------------------|
| 0.0-0.9   | 11              | 0                  | 0.000                | 0.048                 |
| 1.0-1.9   | 36              | 2                  | 0.056                | 0.074                 |
| 2.0-2.9   | 8               | 0                  | 0.000                | 0.091                 |
| 3.0-3.9   | 70              | 5                  | 0.071                | 0.110                 |
| 4.0-4.9   | 61              | 8                  | 0.131                | 0.147                 |
| 5.0-5.9   | 47              | 8                  | 0.170                | 0.181                 |
| 6.0-6.9   | 73              | 16                 | 0.219                | 0.222                 |
| 7.0-7.9   | 54              | 15                 | 0.278                | 0.280                 |
| 8.0-8.9   | 52              | 16                 | 0.308                | 0.330                 |
| 9.0-9.9   | 43              | 20                 | 0.465                | 0.398                 |
| 10.0-10.9 | 33              | 21                 | 0.636                | 0.473                 |
| 11.0-11.9 | 39              | 27                 | 0.692                | 0.544                 |
| 12.0-12.9 | 36              | 22                 | 0.611                | 0.601                 |
| 13.0-13.9 | 44              | 30                 | 0.682                | 0.654                 |
| 14.0-14.9 | 20              | 13                 | 0.650                | 0.720                 |
| 15.0-15.9 | 53              | 41                 | 0.774                | 0.773                 |
| 16.0-16.9 | 45              | 32                 | 0.711                | 0.815                 |
| 17.0-17.9 | 54              | 49                 | 0.907                | 0.855                 |
| 18.0-18.9 | 20              | 17                 | 0.850                | 0.888                 |
| 19.0-19.9 | 28              | 23                 | 0.821                | 0.910                 |
| 20.0-20.9 | 9               | 8                  | 0.889                | 0.928                 |
| 21.0-26.0 | 18              | 16                 | 0.889                | 0.961                 |
