# Supplementary material for: Clinical features and predictors of masked uncontrolled hypertension from the Korean Ambulatory Blood Pressure Monitoring Registry
Source: PubMed Central journal article supplement — Korean J Intern Med. 2021 Jun 18;36(5):1102–14. doi: 10.3904/kjim.2020.650 (PMC8435491; doi:10.3904/kjim.2020.650), 2021-06-18
Supplement: kjim-2020-650-suppl4.pdf [file kjim-2020-650-suppl4.pdf]

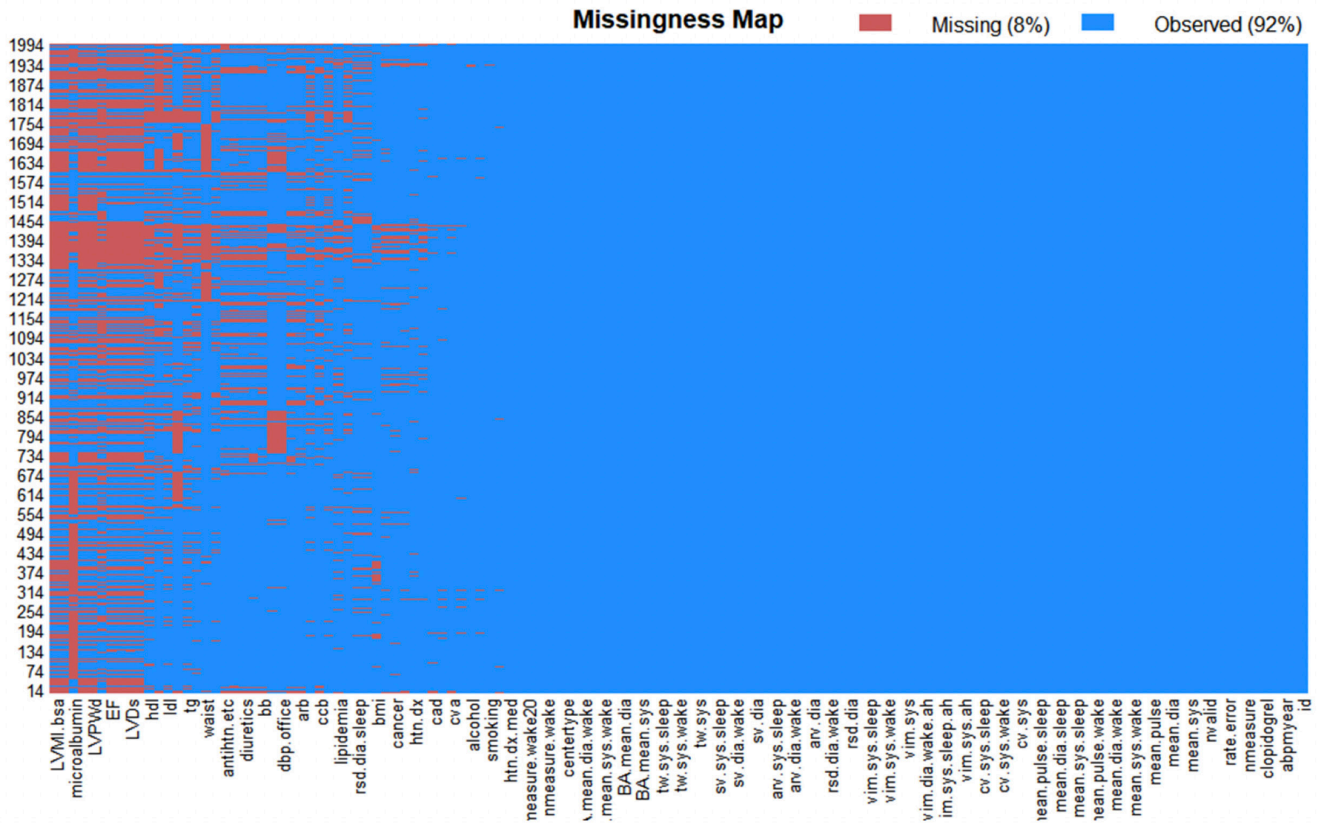

**Supplementary Figure 1.** Missing values in the dataset. There are 8% of missing values in the dataset. The rate of missing values vary between 0% and 58%. Multiple imputation using an expectation and maximization algorithm was employed to fill up the missing values.
