# Supplementary material for: Clinical features and predictors of masked uncontrolled hypertension from the Korean Ambulatory Blood Pressure Monitoring Registry
Source: PubMed Central journal article supplement — Korean J Intern Med. 2021 Jun 18;36(5):1102–14. doi: 10.3904/kjim.2020.650 (PMC8435491; doi:10.3904/kjim.2020.650), 2021-06-18
Supplement: kjim-2020-650-suppl5.pdf [file kjim-2020-650-suppl5.pdf]

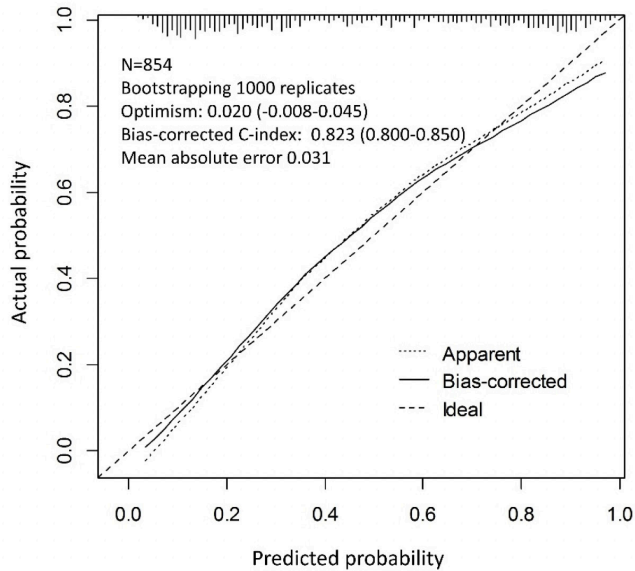

**Supplementary Figure 2.** Internal validation and calibration through bootstrap resampling. Internal validation using 1,000 bootstrap resamples showed that the optimism included in the C-index of the best model was 0.020. Calibration using the 1,000 bootstrap resamples showed only a small amount of the mean absolute error (0.031) and the 0.9 quantile of absolute error (0.062). The bias between predicted probability and actual probability was generally larger in high-probability masked uncontrolled hypertension (MUCH) than in low-probability of MUCH.
